# Supplementary material for: Long-lasting memory of jasmonic acid-dependent immunity requires DNA demethylation and ARGONAUTE1
Source: Research Square preprint supplement (doi:10.21203/rs.3.rs-148432/v1), 2021-08-05
Supplement: Supplementary file 1 [file af2b08a0b8fac61bfafb5217.xlsx]

## Sheet: Info Sheet
	Supplementary Data 11 | GO terms that are statistically enriched in gene clusters VIII-X of Extended Data Fig. 3a.
	Background Information			This data set contains statistically enriched (adjusted p-value < 0.05) biological process Gene Ontology (GO) terms in Extended Data Fig. 3a gene clusters VIII-X which contain genes selected with the criteria W_JA > W_W and JA_JA < W_JA (letters before and after the underscore equate to seedling treatment and challenge respectively).
	Column Information for all Sheets			Column Header			Description
				Term			GO term Accession
				Name			GO term name
				Cluster Ratio			Number of genes in cluster annotated with term / Number of genes in cluster annotated with at least one GO term.
				Background Ratio			All genes in background annotated with term / All genes in background annotated with at least one GO term. Note - The background consisted of all genes ≥ 100 reads across all 16 mRNA-seq libraries.
				Fold Enrichment			Cluster Ratio / Background Ratio
				pvalue			Unadjusted p-value from one-sided Fisher exact test.
				p.adjust			False Discovery Rate (Benjamini & Hochberg method) corrected p-value. Used for ordering terms.
				qvalue			q value
				geneID			TAIR10 identifiers for genes annotated with term in cluster.
	Highlighted cells			GO terms presented in Extended Data Fig. 3b

## Sheet: VIII
Term	Name	Cluster Ratio	Background Ratio	Fold Enrichment	pvalue	p.adjust	qvalue	geneID
GO:0001510	RNA methylation	13/154	172/15076	7.39912	2.28198e-08	1.63618e-05	1.53974e-05	AT4G25630/AT4G16720/AT3G57490/AT1G48920/AT5G22650/AT3G60770/AT3G23620/AT2G32220/AT2G37990/AT3G47370/AT5G20160/AT2G33370/AT3G21540
GO:0009218	pyrimidine ribonucleotide metabolic process	11/154	132/15076	8.15801	1.05796e-07	1.63952e-05	1.54288e-05	AT4G25630/AT3G13160/AT4G04940/AT3G57490/AT1G48920/AT3G10530/AT5G22650/AT1G53645/AT5G11240/AT2G34570/AT2G34260
GO:0009220	pyrimidine ribonucleotide biosynthetic process	11/154	132/15076	8.15801	1.05796e-07	1.63952e-05	1.54288e-05	AT4G25630/AT3G13160/AT4G04940/AT3G57490/AT1G48920/AT3G10530/AT5G22650/AT1G53645/AT5G11240/AT2G34570/AT2G34260
GO:0006220	pyrimidine nucleotide metabolic process	11/154	133/15076	8.09667	1.14332e-07	1.63952e-05	1.54288e-05	AT4G25630/AT3G13160/AT4G04940/AT3G57490/AT1G48920/AT3G10530/AT5G22650/AT1G53645/AT5G11240/AT2G34570/AT2G34260
GO:0006221	pyrimidine nucleotide biosynthetic process	11/154	133/15076	8.09667	1.14332e-07	1.63952e-05	1.54288e-05	AT4G25630/AT3G13160/AT4G04940/AT3G57490/AT1G48920/AT3G10530/AT5G22650/AT1G53645/AT5G11240/AT2G34570/AT2G34260
GO:0072528	pyrimidine-containing compound biosynthetic process	11/154	140/15076	7.69184	1.93254e-07	2.30939e-05	2.17326e-05	AT4G25630/AT3G13160/AT4G04940/AT3G57490/AT1G48920/AT3G10530/AT5G22650/AT1G53645/AT5G11240/AT2G34570/AT2G34260
GO:0072527	pyrimidine-containing compound metabolic process	11/154	146/15076	7.37573	2.95953e-07	3.0314e-05	2.85272e-05	AT4G25630/AT3G13160/AT4G04940/AT3G57490/AT1G48920/AT3G10530/AT5G22650/AT1G53645/AT5G11240/AT2G34570/AT2G34260
GO:0009165	nucleotide biosynthetic process	17/154	456/15076	3.64964	4.23025e-06	0.000344285	0.000323991	AT4G25630/AT3G59670/AT3G13160/AT4G34740/AT4G04940/AT3G57490/AT1G48920/AT3G10530/AT1G52160/AT5G64420/AT5G22650/AT1G42440/AT1G53645/AT5G11240/AT2G34570/AT1G44900/AT2G34260
GO:1901293	nucleoside phosphate biosynthetic process	17/154	457/15076	3.64165	4.35545e-06	0.000344285	0.000323991	AT4G25630/AT3G59670/AT3G13160/AT4G34740/AT4G04940/AT3G57490/AT1G48920/AT3G10530/AT1G52160/AT5G64420/AT5G22650/AT1G42440/AT1G53645/AT5G11240/AT2G34570/AT1G44900/AT2G34260
GO:0009451	RNA modification	14/154	318/15076	4.30989	4.80174e-06	0.000344285	0.000323991	AT1G01320/AT4G25630/AT4G16720/AT3G57490/AT1G48920/AT5G22650/AT3G60770/AT3G23620/AT2G32220/AT2G37990/AT3G47370/AT5G20160/AT2G33370/AT3G21540
GO:0006606	protein import into nucleus	8/154	99/15076	7.9108	7.70717e-06	0.000476085	0.000448022	AT4G15850/AT4G04940/AT1G04190/AT4G34910/AT1G72560/AT2G37990/AT2G34357/AT3G21540
GO:0048580	regulation of post-embryonic development	16/154	428/15076	3.65967	7.96795e-06	0.000476085	0.000448022	AT4G26150/AT1G20450/AT3G13160/AT1G07430/AT1G53090/AT1G04190/AT1G72560/AT5G56740/AT1G60190/AT5G22650/AT4G31160/AT5G37190/AT5G11240/AT1G67630/AT1G44900/AT2G37990
GO:0051170	import into nucleus	8/154	102/15076	7.67813	9.62072e-06	0.000530619	0.000499342	AT4G15850/AT4G04940/AT1G04190/AT4G34910/AT1G72560/AT2G37990/AT2G34357/AT3G21540
GO:0034504	protein localization to nucleus	8/154	104/15076	7.53047	1.11074e-05	0.000568856	0.000535325	AT4G15850/AT4G04940/AT1G04190/AT4G34910/AT1G72560/AT2G37990/AT2G34357/AT3G21540
GO:0000478	endonucleolytic cleavage involved in rRNA processing	4/154	16/15076	24.474	1.73196e-05	0.000776135	0.000730386	AT1G48920/AT5G11240/AT2G37990/AT5G20160
GO:0090502	RNA phosphodiester bond hydrolysis, endonucleolytic	4/154	16/15076	24.474	1.73196e-05	0.000776135	0.000730386	AT1G48920/AT5G11240/AT2G37990/AT5G20160
GO:0000469	cleavage involved in rRNA processing	4/154	17/15076	23.0344	2.2469e-05	0.000932638	0.000877664	AT1G48920/AT5G11240/AT2G37990/AT5G20160
GO:0072594	establishment of protein localization to organelle	16/154	467/15076	3.35404	2.34135e-05	0.000932638	0.000877664	AT5G57180/AT4G15850/AT4G04940/AT1G04190/AT4G34910/AT1G72560/AT5G27150/AT4G26210/AT4G39730/AT2G17670/AT5G38890/AT2G36070/AT2G37990/AT1G54770/AT2G34357/AT3G21540
GO:0033365	protein localization to organelle	16/154	476/15076	3.29063	2.95148e-05	0.00105811	0.000995736	AT5G57180/AT4G15850/AT4G04940/AT1G04190/AT4G34910/AT1G72560/AT5G27150/AT4G26210/AT4G39730/AT2G17670/AT5G38890/AT2G36070/AT2G37990/AT1G54770/AT2G34357/AT3G21540
GO:2000026	regulation of multicellular organismal development	16/154	476/15076	3.29063	2.95148e-05	0.00105811	0.000995736	AT4G26150/AT1G20450/AT3G13160/AT1G07430/AT1G53090/AT1G04190/AT1G72560/AT5G56740/AT1G60190/AT5G22650/AT4G31160/AT5G37190/AT5G11240/AT1G67630/AT1G44900/AT2G37990
GO:0051239	regulation of multicellular organismal process	16/154	490/15076	3.19661	4.18231e-05	0.00142796	0.00134379	AT4G26150/AT1G20450/AT3G13160/AT1G07430/AT1G53090/AT1G04190/AT1G72560/AT5G56740/AT1G60190/AT5G22650/AT4G31160/AT5G37190/AT5G11240/AT1G67630/AT1G44900/AT2G37990
GO:0090501	RNA phosphodiester bond hydrolysis	4/154	22/15076	17.7993	6.63647e-05	0.00216289	0.0020354	AT1G48920/AT5G11240/AT2G37990/AT5G20160
GO:0006626	protein targeting to mitochondrion	7/154	103/15076	6.65313	8.8347e-05	0.00253379	0.00238444	AT4G15850/AT4G26210/AT2G17670/AT5G38890/AT2G36070/AT2G37990/AT1G54770
GO:0070585	protein localization to mitochondrion	7/154	103/15076	6.65313	8.8347e-05	0.00253379	0.00238444	AT4G15850/AT4G26210/AT2G17670/AT5G38890/AT2G36070/AT2G37990/AT1G54770
GO:0072655	establishment of protein localization to mitochondrion	7/154	103/15076	6.65313	8.8347e-05	0.00253379	0.00238444	AT4G15850/AT4G26210/AT2G17670/AT5G38890/AT2G36070/AT2G37990/AT1G54770
GO:0006839	mitochondrial transport	8/154	145/15076	5.40116	0.000120736	0.00332951	0.00313326	AT4G15850/AT4G26210/AT2G17670/AT5G38890/AT2G36070/AT2G37990/AT2G46320/AT1G54770
GO:0006913	nucleocytoplasmic transport	8/154	150/15076	5.22113	0.00015272	0.00391072	0.0036802	AT4G15850/AT4G04940/AT1G04190/AT4G34910/AT1G72560/AT2G37990/AT2G34357/AT3G21540
GO:0051169	nuclear transport	8/154	150/15076	5.22113	0.00015272	0.00391072	0.0036802	AT4G15850/AT4G04940/AT1G04190/AT4G34910/AT1G72560/AT2G37990/AT2G34357/AT3G21540
GO:0007005	mitochondrion organization	7/154	120/15076	5.71061	0.000229598	0.0056766	0.005342	AT4G15850/AT4G26210/AT2G17670/AT5G38890/AT2G36070/AT2G37990/AT1G54770
GO:2000241	regulation of reproductive process	12/154	361/15076	3.25416	0.000336177	0.00764641	0.0071957	AT4G26150/AT3G13160/AT1G07430/AT1G04190/AT1G72560/AT5G56740/AT5G22650/AT4G31160/AT5G11240/AT1G67630/AT1G44900/AT2G37990
GO:0006406	mRNA export from nucleus	5/154	60/15076	8.15801	0.000361991	0.00764641	0.0071957	AT4G15850/AT1G72560/AT2G37990/AT2G34357/AT3G21540
GO:0051028	mRNA transport	5/154	60/15076	8.15801	0.000361991	0.00764641	0.0071957	AT4G15850/AT1G72560/AT2G37990/AT2G34357/AT3G21540
GO:0071427	mRNA-containing ribonucleoprotein complex export from nucleus	5/154	60/15076	8.15801	0.000361991	0.00764641	0.0071957	AT4G15850/AT1G72560/AT2G37990/AT2G34357/AT3G21540
GO:0009640	photomorphogenesis	9/154	215/15076	4.09798	0.00036643	0.00764641	0.0071957	AT4G15850/AT1G53090/AT1G04190/AT1G72560/AT4G31160/AT5G37190/AT1G53645/AT1G52830/AT2G37990
GO:0017038	protein import	9/154	216/15076	4.079	0.00037908	0.00764641	0.0071957	AT4G15850/AT4G04940/AT1G04190/AT4G34910/AT1G72560/AT5G27150/AT2G37990/AT2G34357/AT3G21540
GO:0009909	regulation of flower development	11/154	314/15076	3.42948	0.00038392	0.00764641	0.0071957	AT4G26150/AT3G13160/AT1G04190/AT1G72560/AT5G56740/AT5G22650/AT4G31160/AT5G11240/AT1G67630/AT1G44900/AT2G37990
GO:0031503	protein-containing complex localization	5/154	66/15076	7.41637	0.000563971	0.00985046	0.00926983	AT4G15850/AT1G72560/AT2G37990/AT2G34357/AT3G21540
GO:0071166	ribonucleoprotein complex localization	5/154	66/15076	7.41637	0.000563971	0.00985046	0.00926983	AT4G15850/AT1G72560/AT2G37990/AT2G34357/AT3G21540
GO:0071426	ribonucleoprotein complex export from nucleus	5/154	66/15076	7.41637	0.000563971	0.00985046	0.00926983	AT4G15850/AT1G72560/AT2G37990/AT2G34357/AT3G21540
GO:0006403	RNA localization	5/154	67/15076	7.30568	0.000604492	0.00985046	0.00926983	AT4G15850/AT1G72560/AT2G37990/AT2G34357/AT3G21540
GO:0006405	RNA export from nucleus	5/154	67/15076	7.30568	0.000604492	0.00985046	0.00926983	AT4G15850/AT1G72560/AT2G37990/AT2G34357/AT3G21540
GO:0050657	nucleic acid transport	5/154	67/15076	7.30568	0.000604492	0.00985046	0.00926983	AT4G15850/AT1G72560/AT2G37990/AT2G34357/AT3G21540
GO:0050658	RNA transport	5/154	67/15076	7.30568	0.000604492	0.00985046	0.00926983	AT4G15850/AT1G72560/AT2G37990/AT2G34357/AT3G21540
GO:0051236	establishment of RNA localization	5/154	67/15076	7.30568	0.000604492	0.00985046	0.00926983	AT4G15850/AT1G72560/AT2G37990/AT2G34357/AT3G21540
GO:0006611	protein export from nucleus	5/154	70/15076	6.99258	0.000739208	0.0117112	0.0110209	AT4G15850/AT1G72560/AT2G37990/AT2G34357/AT3G21540
GO:0009259	ribonucleotide metabolic process	13/154	452/15076	2.8156	0.000751346	0.0117112	0.0110209	AT4G25630/AT3G13160/AT4G04940/AT3G57490/AT1G48920/AT3G10530/AT5G22650/AT1G53645/AT5G11240/AT2G34570/AT1G44900/AT2G34260/AT3G16890
GO:0051168	nuclear export	5/154	71/15076	6.89409	0.000788741	0.0120325	0.0113232	AT4G15850/AT1G72560/AT2G37990/AT2G34357/AT3G21540
GO:0048831	regulation of shoot system development	11/154	344/15076	3.1304	0.000819715	0.0122445	0.0115227	AT4G26150/AT3G13160/AT1G04190/AT1G72560/AT5G56740/AT5G22650/AT4G31160/AT5G11240/AT1G67630/AT1G44900/AT2G37990
GO:0009260	ribonucleotide biosynthetic process	11/154	358/15076	3.00798	0.00113289	0.0162456	0.015288	AT4G25630/AT3G13160/AT4G04940/AT3G57490/AT1G48920/AT3G10530/AT5G22650/AT1G53645/AT5G11240/AT2G34570/AT2G34260
GO:0046390	ribose phosphate biosynthetic process	11/154	358/15076	3.00798	0.00113289	0.0162456	0.015288	AT4G25630/AT3G13160/AT4G04940/AT3G57490/AT1G48920/AT3G10530/AT5G22650/AT1G53645/AT5G11240/AT2G34570/AT2G34260
GO:0009639	response to red or far red light	11/154	380/15076	2.83383	0.00182009	0.0255883	0.02408	AT2G29090/AT4G15850/AT1G53090/AT1G04190/AT1G72560/AT4G31160/AT5G37190/AT1G53645/AT1G10240/AT1G52830/AT2G37990

## Sheet: IX
Term	Name	Cluster Ratio	Background Ratio	Fold Enrichment	pvalue	p.adjust	qvalue	geneID
GO:0009723	response to ethylene	15/124	322/15076	5.66369	6.19834e-08	1.63199e-05	1.42213e-05	AT1G71030/AT2G27310/AT1G76650/AT1G28480/AT3G14050/AT4G37260/AT3G28930/AT5G13330/AT4G17230/AT2G47190/AT5G27520/AT5G38895/AT2G34600/AT5G17300/AT3G09940
GO:0009753	response to jasmonic acid	18/124	453/15076	4.83102	3.11032e-08	1.63199e-05	1.42213e-05	AT1G71030/AT1G76650/AT5G38710/AT1G28480/AT3G14050/AT2G39030/AT4G37260/AT4G39030/AT3G28930/AT5G13330/AT2G26530/AT4G17230/AT3G02150/AT2G47190/AT5G27520/AT2G34600/AT5G17300/AT3G09940
GO:0009620	response to fungus	18/124	478/15076	4.57835	7.02437e-08	1.63199e-05	1.42213e-05	AT1G75380/AT2G15890/AT1G76650/AT5G38710/AT1G28480/AT3G14050/AT1G72900/AT5G46410/AT3G10985/AT4G39030/AT3G28930/AT1G53320/AT5G17290/AT1G45145/AT3G22231/AT5G27520/AT2G34600/AT3G09940
GO:0009694	jasmonic acid metabolic process	10/124	151/15076	8.0517	4.63404e-07	8.07482e-05	7.03642e-05	AT1G76650/AT5G38710/AT1G28480/AT3G14050/AT4G39030/AT3G02150/AT5G27520/AT2G30870/AT2G34600/AT3G09940
GO:0009751	response to salicylic acid	16/124	437/15076	4.45147	5.8251e-07	8.12019e-05	7.07597e-05	AT1G71030/AT5G38710/AT1G28480/AT5G01900/AT4G37260/AT1G72900/AT4G23270/AT4G39030/AT4G05320/AT3G28930/AT5G13330/AT2G26530/AT4G17230/AT2G47190/AT5G27520/AT5G17300
GO:0009414	response to water deprivation	15/124	394/15076	4.6287	8.28529e-07	9.07359e-05	7.90676e-05	AT5G58350/AT2G27310/AT5G38710/AT1G28480/AT3G14050/AT1G04400/AT5G63850/AT5G13330/AT4G39090/AT2G47190/AT1G29330/AT5G27520/AT2G30870/AT2G34600/AT3G09940
GO:0009415	response to water	15/124	397/15076	4.59373	9.11264e-07	9.07359e-05	7.90676e-05	AT5G58350/AT2G27310/AT5G38710/AT1G28480/AT3G14050/AT1G04400/AT5G63850/AT5G13330/AT4G39090/AT2G47190/AT1G29330/AT5G27520/AT2G30870/AT2G34600/AT3G09940
GO:0009695	jasmonic acid biosynthetic process	9/124	128/15076	8.54864	1.07749e-06	9.38759e-05	8.18038e-05	AT1G76650/AT5G38710/AT1G28480/AT3G14050/AT4G39030/AT5G27520/AT2G30870/AT2G34600/AT3G09940
GO:0006972	hyperosmotic response	11/124	242/15076	5.52639	4.98391e-06	0.000385976	0.000336341	AT2G27310/AT1G28480/AT3G14050/AT1G72150/AT4G39090/AT2G47190/AT3G61440/AT1G29330/AT5G27520/AT2G34600/AT3G09940
GO:0009611	response to wounding	12/124	316/15076	4.61699	1.14171e-05	0.000795769	0.000693436	AT1G76650/AT5G38710/AT3G03990/AT1G28480/AT3G14050/AT2G26530/AT1G51760/AT2G47190/AT5G27520/AT2G30870/AT2G34600/AT3G09940
GO:0042737	drug catabolic process	8/124	134/15076	7.25855	1.46423e-05	0.000927787	0.000808477	AT1G04400/AT4G39030/AT1G20630/AT3G61440/AT5G64370/AT2G30870/AT3G17810/AT3G09940
GO:0006914	autophagy	6/124	69/15076	10.5722	2.1523e-05	0.00115396	0.00100557	AT1G70690/AT4G16520/AT3G43230/AT5G17290/AT1G29330/AT5G38895
GO:0061919	process utilizing autophagic mechanism	6/124	69/15076	10.5722	2.1523e-05	0.00115396	0.00100557	AT1G70690/AT4G16520/AT3G43230/AT5G17290/AT1G29330/AT5G38895
GO:0042538	hyperosmotic salinity response	8/124	154/15076	6.31588	3.9975e-05	0.00199019	0.00173426	AT2G27310/AT1G28480/AT3G14050/AT2G47190/AT1G29330/AT5G27520/AT2G34600/AT3G09940
GO:0010200	response to chitin	12/124	402/15076	3.62927	0.000118464	0.0055046	0.00479673	AT2G27310/AT1G76650/AT4G37260/AT4G39030/AT3G28930/AT3G55430/AT2G26530/AT4G17230/AT1G32460/AT5G27520/AT5G38895/AT2G34600
GO:0010243	response to organonitrogen compound	12/124	424/15076	3.44096	0.000194519	0.00847372	0.00738404	AT2G27310/AT1G76650/AT4G37260/AT4G39030/AT3G28930/AT3G55430/AT2G26530/AT4G17230/AT1G32460/AT5G27520/AT5G38895/AT2G34600
GO:0009867	jasmonic acid mediated signaling pathway	9/124	275/15076	3.979	0.000447293	0.0173202	0.0150929	AT5G38710/AT1G28480/AT4G39030/AT3G28930/AT2G26530/AT4G17230/AT5G27520/AT2G34600/AT3G09940
GO:0071395	cellular response to jasmonic acid stimulus	9/124	275/15076	3.979	0.000447293	0.0173202	0.0150929	AT5G38710/AT1G28480/AT4G39030/AT3G28930/AT2G26530/AT4G17230/AT5G27520/AT2G34600/AT3G09940
GO:0009850	auxin metabolic process	6/124	127/15076	5.74397	0.000630126	0.0231157	0.0201431	AT2G04400/AT4G39030/AT3G61440/AT5G27520/AT2G30870/AT5G17300
GO:0009738	abscisic acid-activated signaling pathway	8/124	233/15076	4.17444	0.000682461	0.0237837	0.0207252	AT2G27310/AT1G76650/AT1G28480/AT3G14050/AT2G47190/AT5G27520/AT2G34600/AT3G09940
GO:0051187	cofactor catabolic process	6/124	134/15076	5.44391	0.000835152	0.0238737	0.0208036	AT1G16840/AT1G04400/AT3G19553/AT1G20630/AT3G61440/AT3G09940
GO:0007568	aging	6/124	136/15076	5.36385	0.000902255	0.0238737	0.0208036	AT5G58350/AT3G10985/AT4G05320/AT5G13330/AT5G17290/AT2G47190
GO:0071215	cellular response to abscisic acid stimulus	8/124	244/15076	3.98625	0.000921005	0.0238737	0.0208036	AT2G27310/AT1G76650/AT1G28480/AT3G14050/AT2G47190/AT5G27520/AT2G34600/AT3G09940
GO:0097306	cellular response to alcohol	8/124	244/15076	3.98625	0.000921005	0.0238737	0.0208036	AT2G27310/AT1G76650/AT1G28480/AT3G14050/AT2G47190/AT5G27520/AT2G34600/AT3G09940
GO:0010363	regulation of plant-type hypersensitive response	10/124	364/15076	3.34013	0.000846972	0.0238737	0.0208036	AT1G77380/AT5G38710/AT1G28480/AT1G72900/AT4G39030/AT3G28930/AT2G26530/AT4G17230/AT2G18730/AT5G27520
GO:0006612	protein targeting to membrane	10/124	367/15076	3.31282	0.000901582	0.0238737	0.0208036	AT1G77380/AT5G38710/AT1G28480/AT1G72900/AT4G39030/AT3G28930/AT2G26530/AT4G17230/AT2G18730/AT5G27520
GO:0072657	protein localization to membrane	10/124	370/15076	3.28596	0.000959058	0.0238737	0.0208036	AT1G77380/AT5G38710/AT1G28480/AT1G72900/AT4G39030/AT3G28930/AT2G26530/AT4G17230/AT2G18730/AT5G27520
GO:0090150	establishment of protein localization to membrane	10/124	370/15076	3.28596	0.000959058	0.0238737	0.0208036	AT1G77380/AT5G38710/AT1G28480/AT1G72900/AT4G39030/AT3G28930/AT2G26530/AT4G17230/AT2G18730/AT5G27520
GO:0080135	regulation of cellular response to stress	10/124	377/15076	3.22495	0.00110495	0.026557	0.0231419	AT1G77380/AT5G38710/AT1G28480/AT1G72900/AT4G39030/AT3G28930/AT2G26530/AT4G17230/AT2G18730/AT5G27520
GO:0010260	animal organ senescence	3/124	29/15076	12.5773	0.00169746	0.0287974	0.0250942	AT5G58350/AT5G13330/AT2G47190
GO:0043562	cellular response to nitrogen levels	3/124	29/15076	12.5773	0.00169746	0.0287974	0.0250942	AT1G20630/AT5G64370/AT3G17810
GO:0009692	ethylene metabolic process	5/124	109/15076	5.57709	0.00205156	0.0287974	0.0250942	AT2G27310/AT1G28480/AT1G72900/AT4G17230/AT2G34600
GO:0009693	ethylene biosynthetic process	5/124	109/15076	5.57709	0.00205156	0.0287974	0.0250942	AT2G27310/AT1G28480/AT1G72900/AT4G17230/AT2G34600
GO:0009851	auxin biosynthetic process	5/124	109/15076	5.57709	0.00205156	0.0287974	0.0250942	AT2G04400/AT4G39030/AT3G61440/AT2G30870/AT5G17300
GO:0043449	cellular alkene metabolic process	5/124	109/15076	5.57709	0.00205156	0.0287974	0.0250942	AT2G27310/AT1G28480/AT1G72900/AT4G17230/AT2G34600
GO:0043450	alkene biosynthetic process	5/124	109/15076	5.57709	0.00205156	0.0287974	0.0250942	AT2G27310/AT1G28480/AT1G72900/AT4G17230/AT2G34600
GO:1900673	olefin metabolic process	5/124	109/15076	5.57709	0.00205156	0.0287974	0.0250942	AT2G27310/AT1G28480/AT1G72900/AT4G17230/AT2G34600
GO:1900674	olefin biosynthetic process	5/124	109/15076	5.57709	0.00205156	0.0287974	0.0250942	AT2G27310/AT1G28480/AT1G72900/AT4G17230/AT2G34600
GO:0098754	detoxification	7/124	208/15076	4.09166	0.00165936	0.0287974	0.0250942	AT1G10070/AT2G38240/AT5G38710/AT5G13330/AT3G61440/AT2G30870/AT5G01720
GO:0009863	salicylic acid mediated signaling pathway	9/124	334/15076	3.27613	0.00175881	0.0287974	0.0250942	AT5G38710/AT1G28480/AT5G01900/AT1G72900/AT4G39030/AT3G28930/AT2G26530/AT4G17230/AT5G27520
GO:0071446	cellular response to salicylic acid stimulus	9/124	335/15076	3.26635	0.00179505	0.0287974	0.0250942	AT5G38710/AT1G28480/AT5G01900/AT1G72900/AT4G39030/AT3G28930/AT2G26530/AT4G17230/AT5G27520
GO:0071236	cellular response to antibiotic	9/124	343/15076	3.19016	0.00210713	0.0287974	0.0250942	AT5G38710/AT1G28480/AT5G01900/AT1G72900/AT4G39030/AT3G28930/AT2G26530/AT4G17230/AT5G27520
GO:0043067	regulation of programmed cell death	10/124	386/15076	3.14976	0.00131879	0.0287974	0.0250942	AT1G77380/AT5G38710/AT1G28480/AT1G72900/AT4G39030/AT3G28930/AT2G26530/AT4G17230/AT2G18730/AT5G27520
GO:0010941	regulation of cell death	10/124	391/15076	3.10948	0.00145147	0.0287974	0.0250942	AT1G77380/AT5G38710/AT1G28480/AT1G72900/AT4G39030/AT3G28930/AT2G26530/AT4G17230/AT2G18730/AT5G27520
GO:0009626	plant-type hypersensitive response	10/124	392/15076	3.10155	0.00147927	0.0287974	0.0250942	AT1G77380/AT5G38710/AT1G28480/AT1G72900/AT4G39030/AT3G28930/AT2G26530/AT4G17230/AT2G18730/AT5G27520
GO:0034050	host programmed cell death induced by symbiont	10/124	393/15076	3.09366	0.0015075	0.0287974	0.0250942	AT1G77380/AT5G38710/AT1G28480/AT1G72900/AT4G39030/AT3G28930/AT2G26530/AT4G17230/AT2G18730/AT5G27520
GO:0045088	regulation of innate immune response	10/124	406/15076	2.9946	0.00191619	0.0287974	0.0250942	AT1G77380/AT5G38710/AT1G28480/AT1G72900/AT4G39030/AT3G28930/AT2G26530/AT4G17230/AT2G18730/AT5G27520
GO:0050776	regulation of immune response	10/124	408/15076	2.97992	0.00198635	0.0287974	0.0250942	AT1G77380/AT5G38710/AT1G28480/AT1G72900/AT4G39030/AT3G28930/AT2G26530/AT4G17230/AT2G18730/AT5G27520
GO:0002682	regulation of immune system process	10/124	411/15076	2.95817	0.00209547	0.0287974	0.0250942	AT1G77380/AT5G38710/AT1G28480/AT1G72900/AT4G39030/AT3G28930/AT2G26530/AT4G17230/AT2G18730/AT5G27520
GO:0046700	heterocycle catabolic process	11/124	464/15076	2.8823	0.00154889	0.0287974	0.0250942	AT2G04400/AT1G16840/AT5G38710/AT3G24740/AT1G72150/AT3G19553/AT4G39090/AT3G61440/AT5G64370/AT2G30870/AT3G17810
GO:1901361	organic cyclic compound catabolic process	11/124	470/15076	2.8455	0.00171438	0.0287974	0.0250942	AT2G04400/AT1G16840/AT5G38710/AT3G24740/AT1G72150/AT3G19553/AT4G39090/AT3G61440/AT5G64370/AT2G30870/AT3G17810
GO:0009873	ethylene-activated signaling pathway	5/124	114/15076	5.33248	0.00249554	0.0334498	0.0291483	AT2G27310/AT1G76650/AT4G17230/AT5G38895/AT2G34600
GO:0042744	hydrogen peroxide catabolic process	4/124	71/15076	6.84961	0.00276974	0.0364246	0.0317406	AT1G04400/AT1G20630/AT3G61440/AT3G09940
GO:0017001	antibiotic catabolic process	4/124	72/15076	6.75448	0.00291427	0.0376156	0.0327784	AT1G04400/AT1G20630/AT3G61440/AT3G09940
GO:0035690	cellular response to drug	9/124	362/15076	3.02272	0.00302352	0.0383162	0.0333889	AT5G38710/AT1G28480/AT5G01900/AT1G72900/AT4G39030/AT3G28930/AT2G26530/AT4G17230/AT5G27520
GO:0012501	programmed cell death	10/124	435/15076	2.79496	0.00315425	0.0392591	0.0342106	AT1G77380/AT5G38710/AT1G28480/AT1G72900/AT4G39030/AT3G28930/AT2G26530/AT4G17230/AT2G18730/AT5G27520
GO:0009610	response to symbiotic fungus	3/124	37/15076	9.85789	0.00344107	0.0399737	0.0348333	AT1G72900/AT5G46410/AT3G09940
GO:0046482	para-aminobenzoic acid metabolic process	3/124	37/15076	9.85789	0.00344107	0.0399737	0.0348333	AT5G07440/AT1G23440/AT5G13330
GO:0000160	phosphorelay signal transduction system	5/124	122/15076	4.98281	0.00334545	0.0399737	0.0348333	AT2G27310/AT1G76650/AT4G17230/AT5G38895/AT2G34600
GO:0071407	cellular response to organic cyclic compound	9/124	368/15076	2.97344	0.00337055	0.0399737	0.0348333	AT5G38710/AT1G28480/AT5G01900/AT1G72900/AT4G39030/AT3G28930/AT2G26530/AT4G17230/AT5G27520
GO:0009608	response to symbiont	3/124	38/15076	9.59847	0.0037138	0.0424347	0.0369778	AT1G72900/AT5G46410/AT3G09940
GO:0071369	cellular response to ethylene stimulus	5/124	127/15076	4.78664	0.00397222	0.0446555	0.038913	AT2G27310/AT1G76650/AT4G17230/AT5G38895/AT2G34600
GO:0010286	heat acclimation	4/124	80/15076	6.07903	0.00426045	0.0471355	0.041074	AT2G27310/AT5G27520/AT5G04760/AT5G38895
GO:0035556	intracellular signal transduction	10/124	456/15076	2.66624	0.00439764	0.047893	0.0417342	AT2G27310/AT1G76650/AT2G35680/AT1G28480/AT4G39030/AT3G28930/AT4G17230/AT5G27520/AT5G38895/AT2G34600
GO:0042742	defense response to bacterium	9/124	386/15076	2.83478	0.0046032	0.0486126	0.0423612	AT2G04400/AT1G70690/AT1G28480/AT5G01900/AT4G23270/AT4G39030/AT3G28930/AT4G39090/AT2G30870
GO:0046686	response to cadmium ion	10/124	459/15076	2.64882	0.00460313	0.0486126	0.0423612	AT5G07440/AT1G71030/AT4G37260/AT1G72150/AT4G39090/AT1G20630/AT2G47190/AT1G45145/AT3G61440/AT2G30870

## Sheet: X
Term	Name	Cluster Ratio	Background Ratio	Fold Enrichment	pvalue	p.adjust	qvalue	geneID
